# Supplementary material
Source: PubMed Central journal article supplement (PMC4198028)
Supplement: embj0033-1256-sd1.pdf [file embj0033-1256-sd1.pdf]

Knockout-first (promoter)

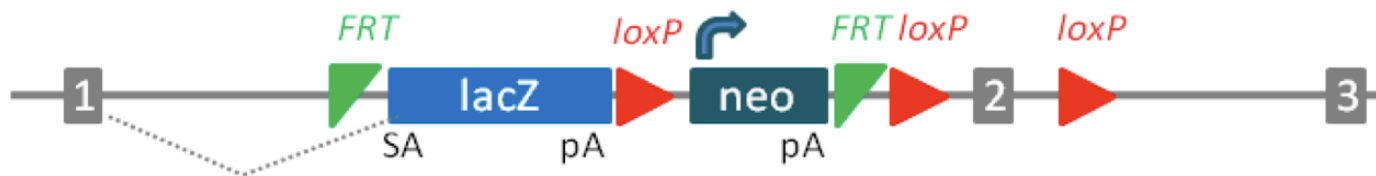

EUCOMM,  
KOMP-CSD

**Stag3<sup>+/+</sup>**

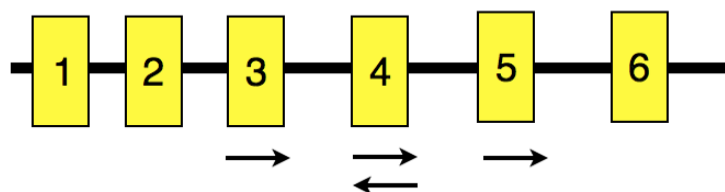

RT-PCR Primer

**Stag3<sup>ko/ko</sup>**

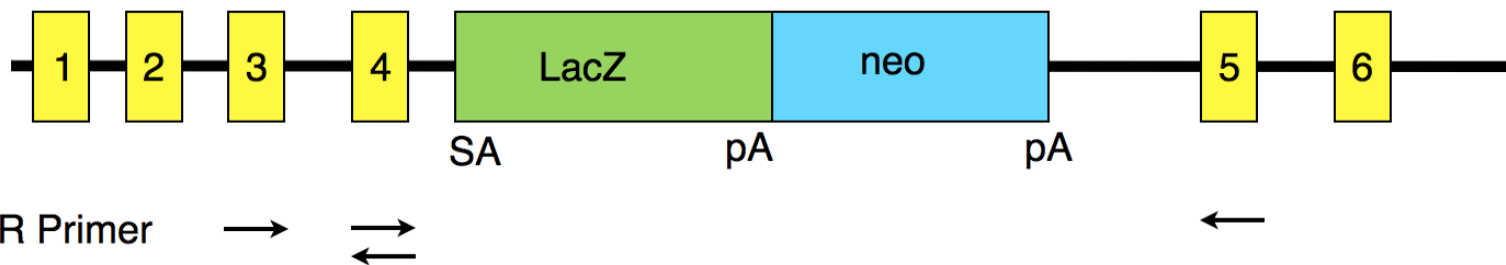

RT-PCR Primer

**Supplemental Figure S1:** Knockout-first construct used by KOMP to generate the *Stag3<sup>ko/ko</sup>* mice. When homozygous for this locus, the splice acceptor (SA) within the lacZ gene prevents correct splicing and no protein is produced. The relevant exons of the Stag3 gene, the *Stag3<sup>ko/ko</sup>* genomic arrangement, and the PCR primers are shown.
