# Supplementary material
Source: PubMed Central journal article supplement (PMC4198028)
Supplement: embj0033-1256-sd3.pdf [file embj0033-1256-sd3.pdf]

**Stag3<sup>ko/ko</sup>**

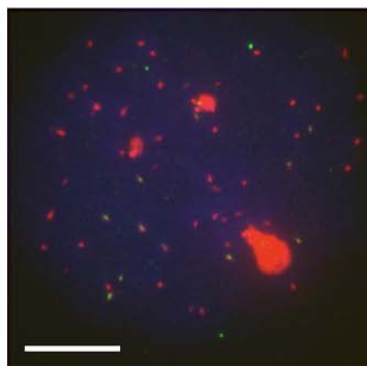

**SYCP3 SYCP1 DAPI**

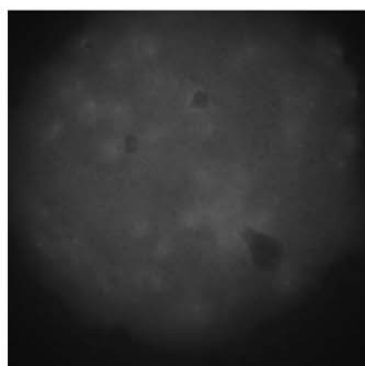

**DAPI**

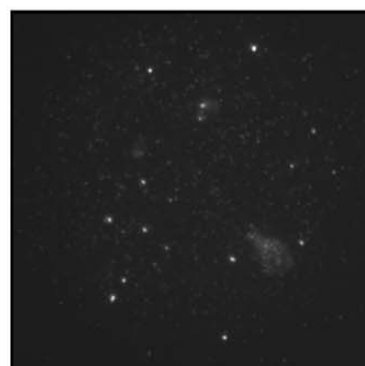

**SYCP1**

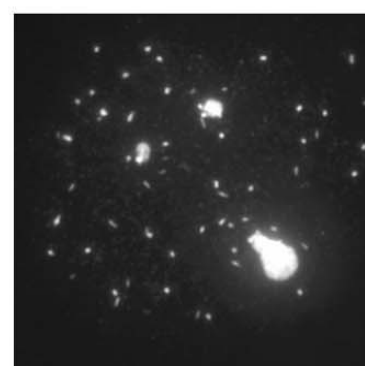

**SYCP3**

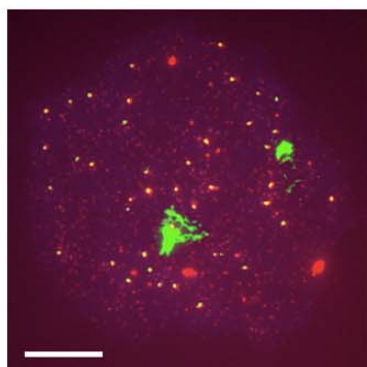

**SYCP3 HORMAD1 DAPI**

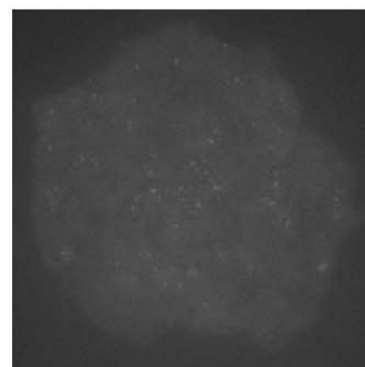

**DAPI**

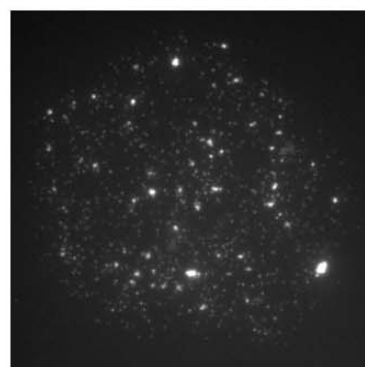

**HORMAD1**

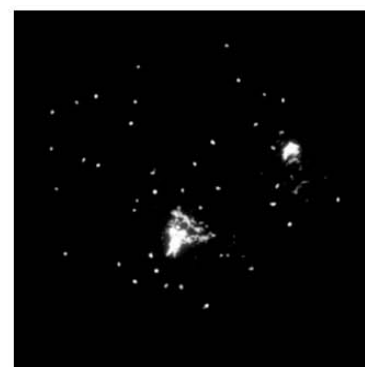

**SYCP3**

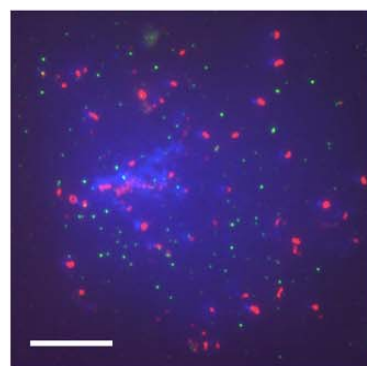

**SYCP3 DMC1 DAPI**

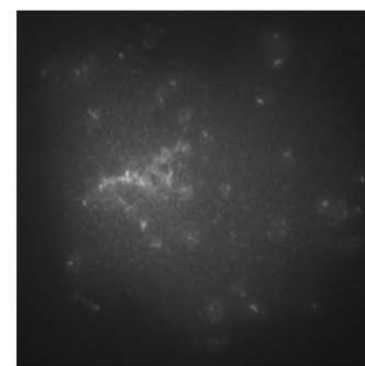

**DAPI**

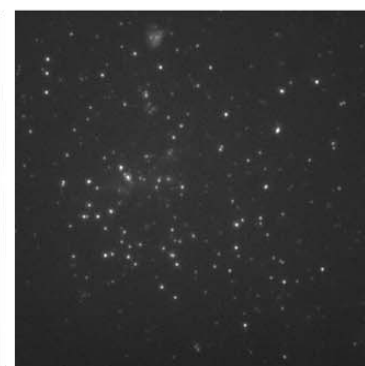

**DMC1**

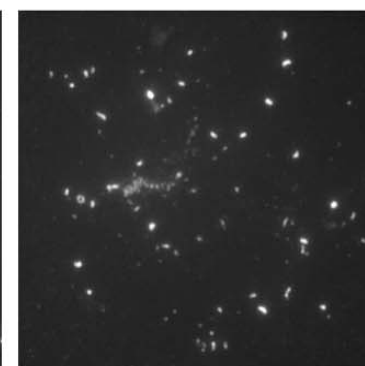

**SYCP3**

**Supplemental Figure S3:** Single color channel and merged images of *Stag3<sup>ko/ko</sup>* spermatocyte chromosome spreads stained with DAPI and anti-SYCP3 and either anti-SYCP1, anti-HORMAD1, or anti-DMC1 as indicated. Size bars indicate 10  $\mu$ m.
