# Supplementary material
Source: PubMed Central journal article supplement (PMC4198028)
Supplement: embj0033-1256-sd4.pdf [file embj0033-1256-sd4.pdf]

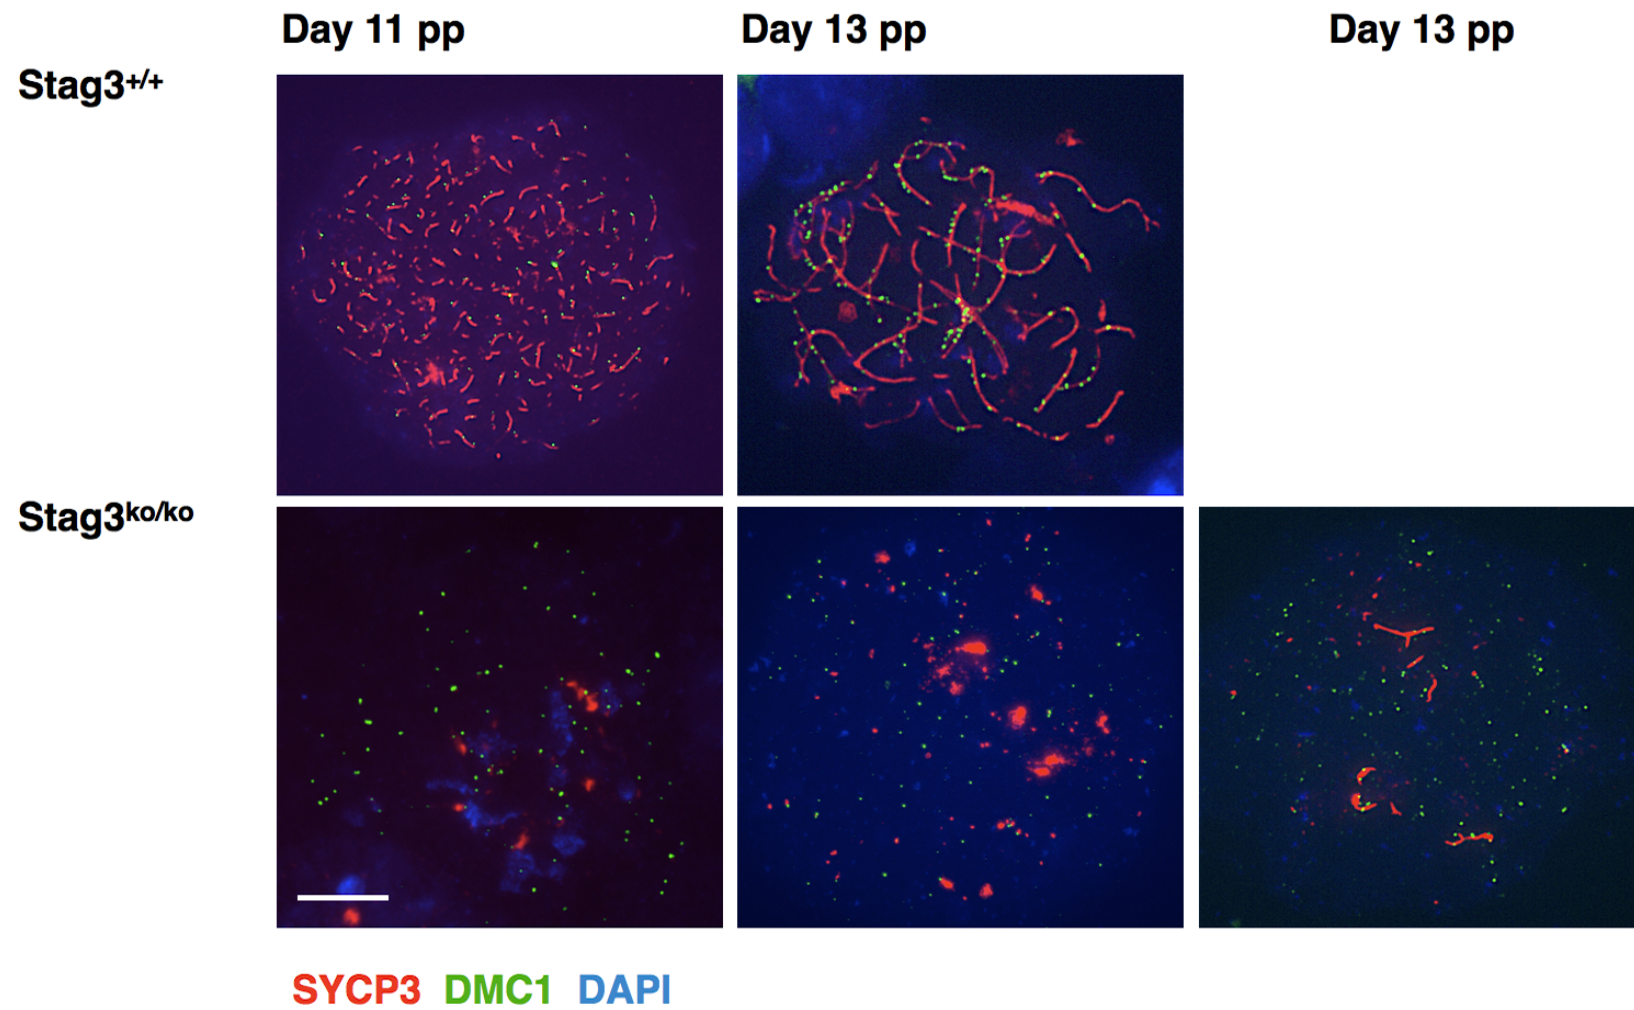

**Supplemental Figure S4:** Staining of wt and *Stag3<sup>ko/ko</sup>* testis nuclei from juvenile mice of day 11 and 13 pp for DMC1, SYCP3 and nucleic acid. An additional, rare example of *Stag3<sup>ko/ko</sup>* nuclei showing some axes-like structures is shown for day 13 pp. Size bar indicates 10  $\mu\text{m}$ .
