# Supplementary material
Source: PubMed Central journal article supplement (PMC4198028)
Supplement: embj0033-1256-sd5.pdf [file embj0033-1256-sd5.pdf]

**A**

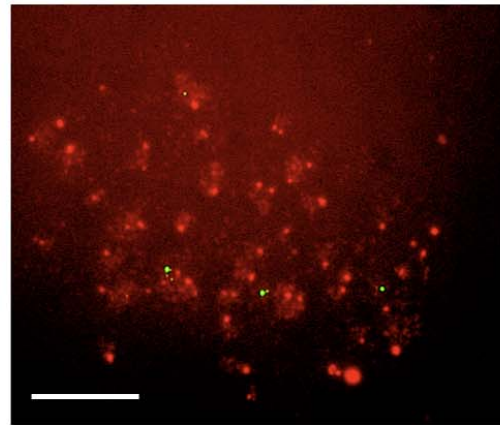

**ACA SYCP3**

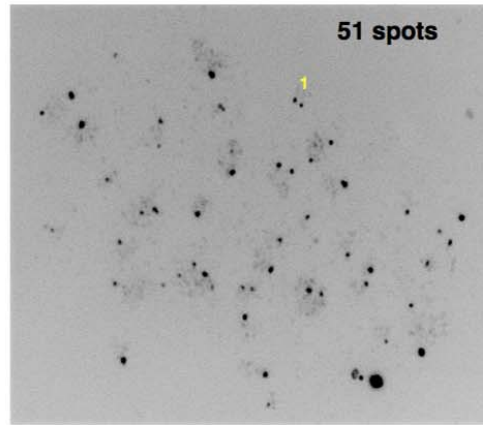

**ACA (color inverted)**

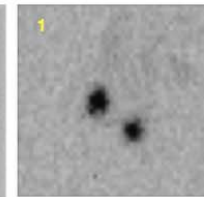

**Stag3<sup>ko/ko</sup>**

**B**

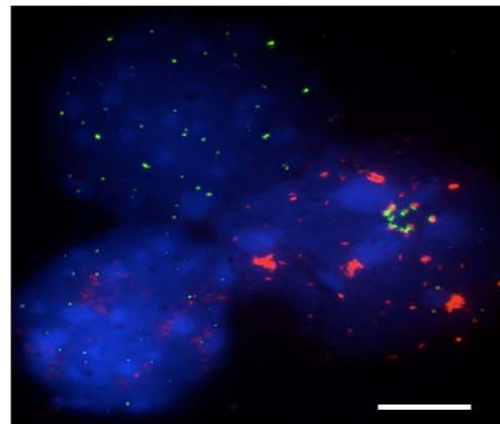

**SYCP3 RAP1 DAPI**

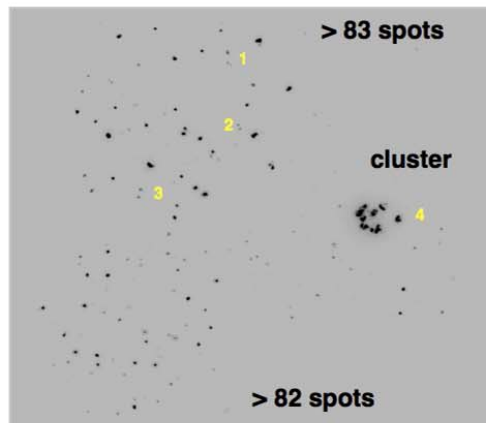

**RAP1 (color inverted)**

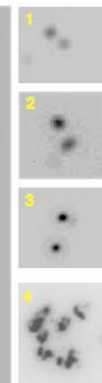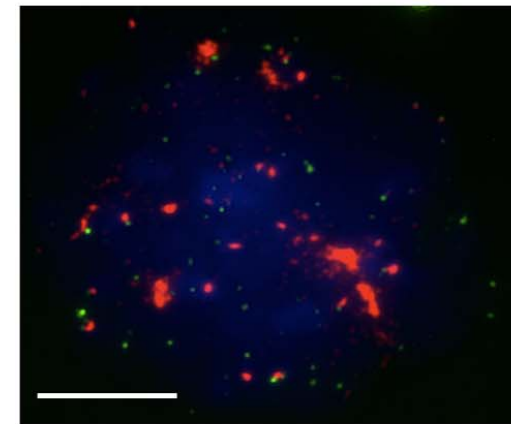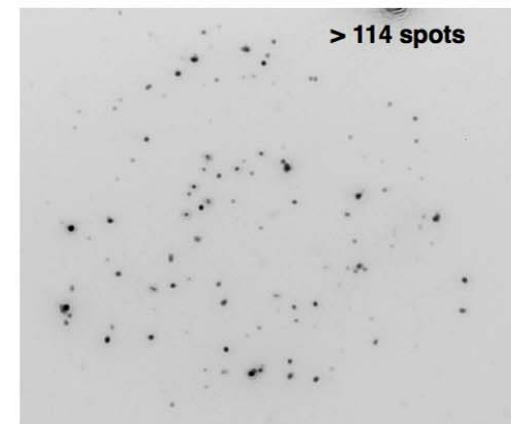

**Supplemental Figure S5:** Examples of inverted color images of centromere (A) or telomere (B) staining of spermatocytes with antibody ACA and anti RAP1 respectively. The minimum numbers of spots counted and a telomere cluster are indicated. Pairs of centromeres or telomeres are magnified in excerpts to indicate loss of centromeric or telomeric cohesion. Size bars indicate 10  $\mu\text{m}$ .
