# Supplementary material
Source: PubMed Central journal article supplement (PMC4198028)
Supplement: embj0033-1256-sd6.pdf [file embj0033-1256-sd6.pdf]

**Stag3<sup>+/+</sup>**

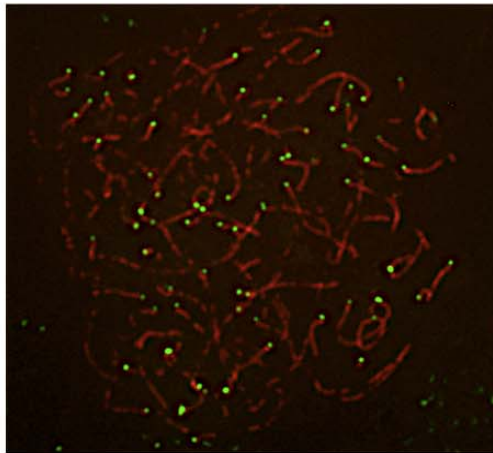

Late Leptonema

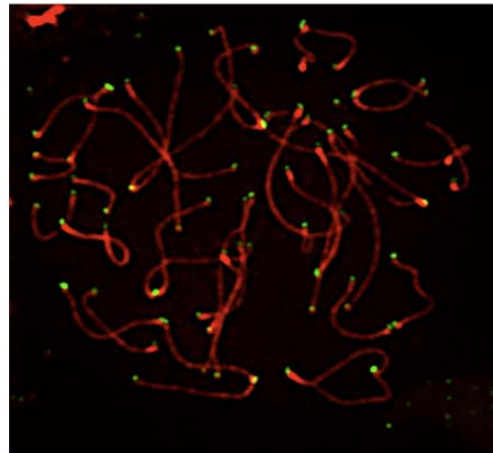

Zygonema

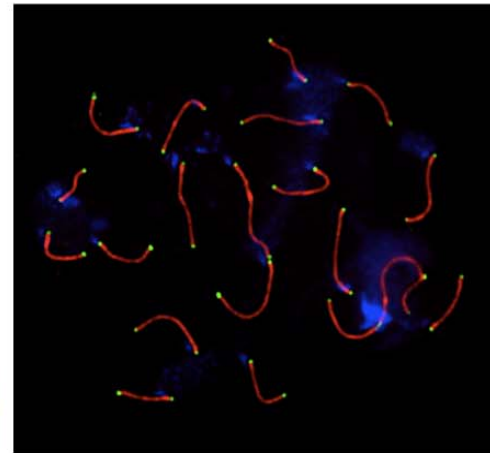

Pachynema

**Stag3<sup>ko/ko</sup>**

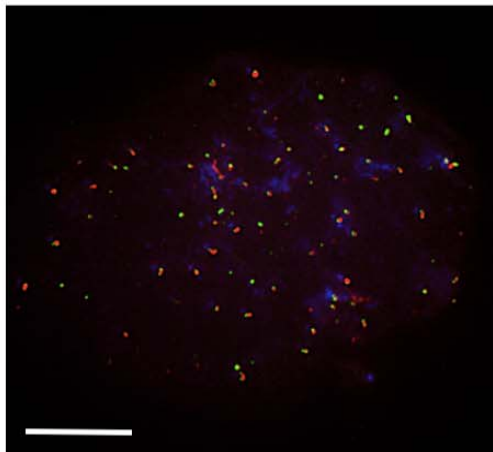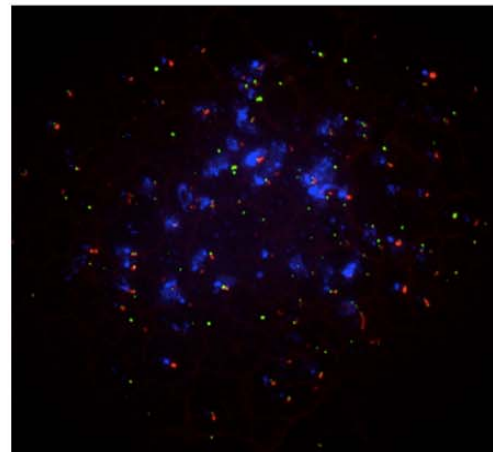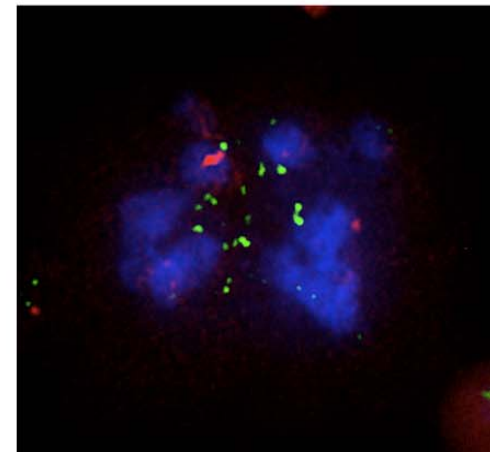

**SYCP3** **Telo-FISH** **DAPI**

**Supplemental Figure S6:** Telo-FISH analysis of wt and *Stag3<sup>ko/ko</sup>* testis chromosome spreads. Three prophase I stages of wt and three examples of *Stag3<sup>ko/ko</sup>* nuclei, including one showing a telomere cluster, are provided. Size bar indicates 10  $\mu$ m.
