# Supplementary material
Source: PubMed Central journal article supplement (PMC4198028)
Supplement: embj0033-1256-sd8.pdf [file embj0033-1256-sd8.pdf]

**A**

**Stag3<sup>+/+</sup>**

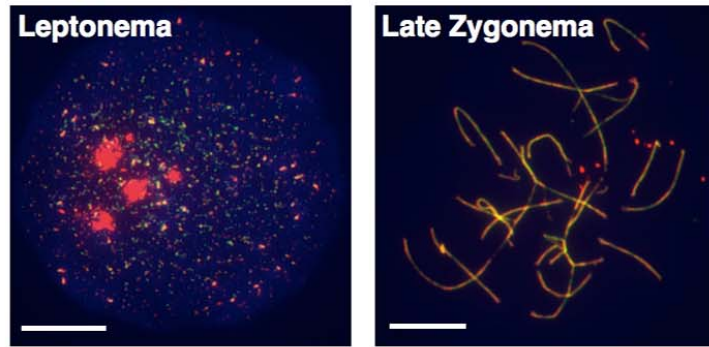

**SYCP3 SMC3 DAPI**

**Stag3<sup>ko/ko</sup>**

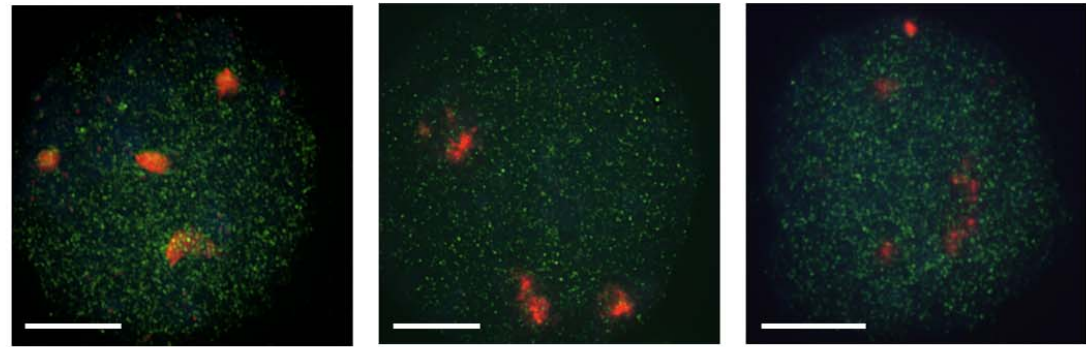

**B**

**Stag3<sup>+/+</sup>**

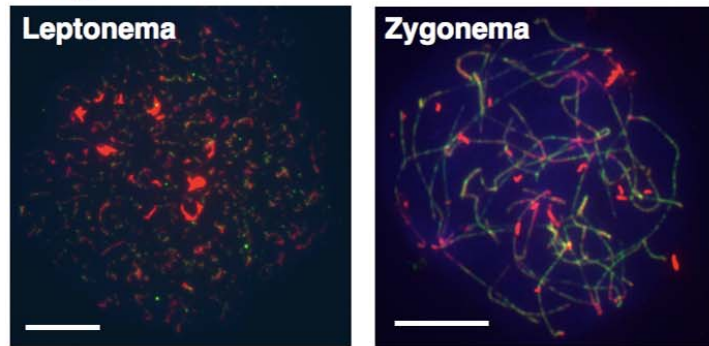

**SYCP3 RAD21L DAPI**

**Stag3<sup>ko/ko</sup>**

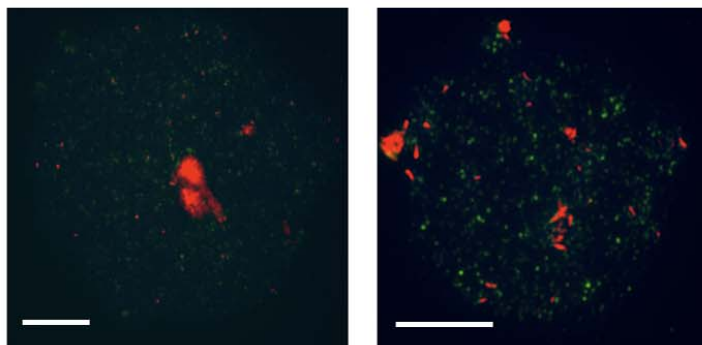

**C**

**Stag3<sup>+/+</sup>**

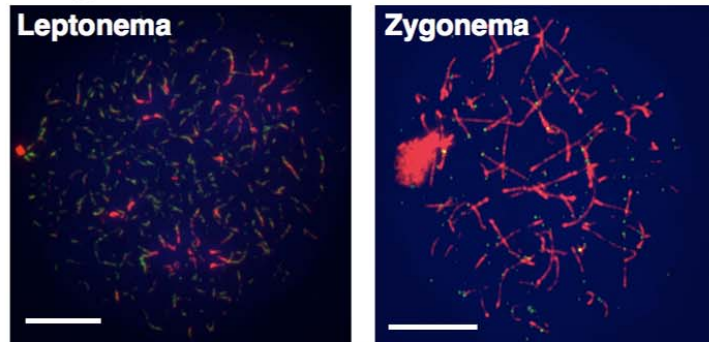

**SYCP3 RAD21 DAPI**

**Stag3<sup>ko/ko</sup>**

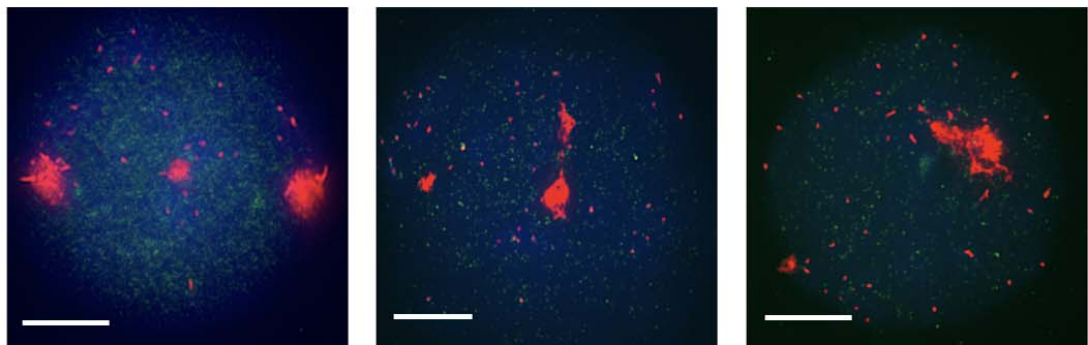

D

**Stag3<sup>+/+</sup>**

**Leptonema**

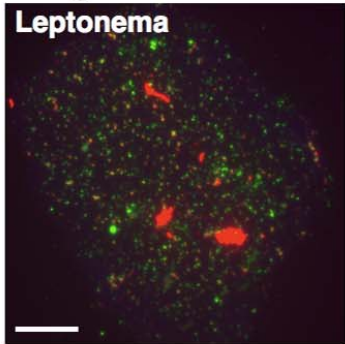

**Early Zygonema**

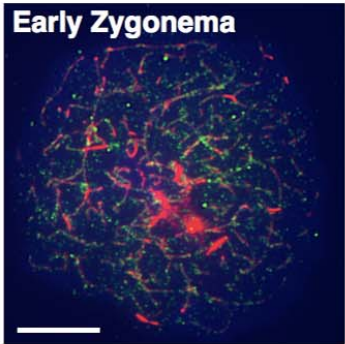

**Late Zygonema**

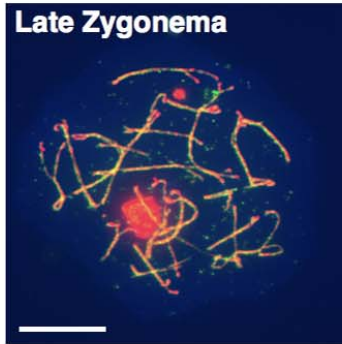

**Stag3<sup>ko/ko</sup>**

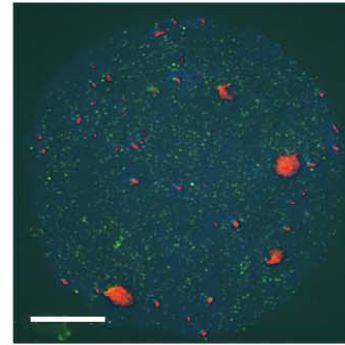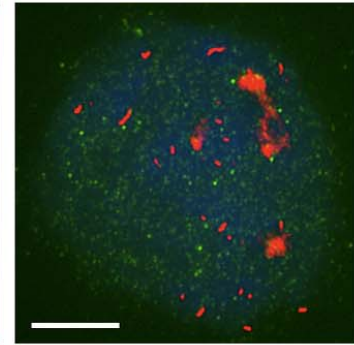

**SYCP3 SMC1β DAPI**

E **Stag3<sup>+/+</sup>**

**Leptonema**

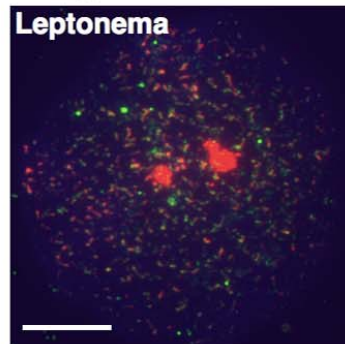

**Zygonema**

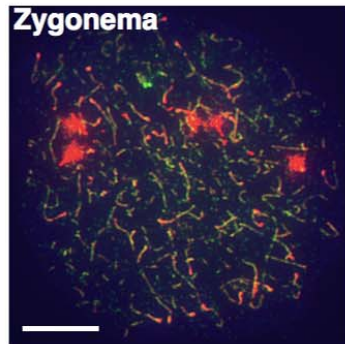

**Stag3<sup>ko/ko</sup>**

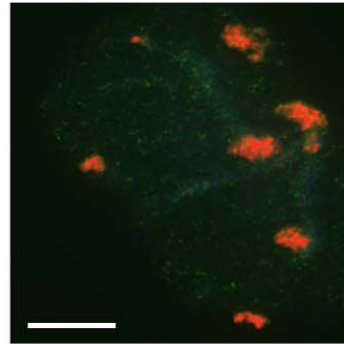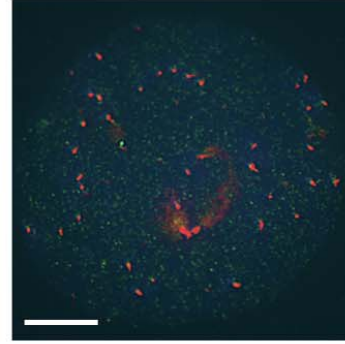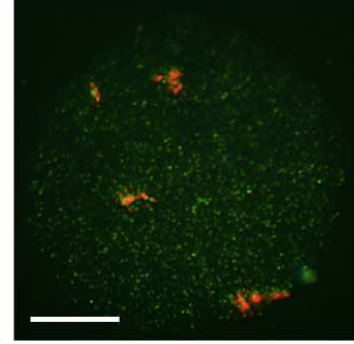

**SYCP3 SMC1α DAPI**

F **Stag3<sup>+/+</sup>**

**Leptonema**

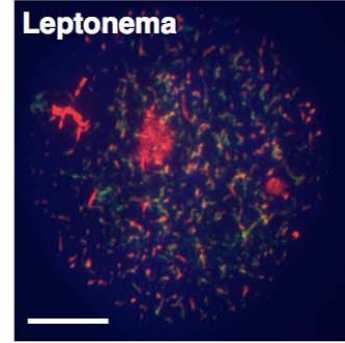

**Zygonema**

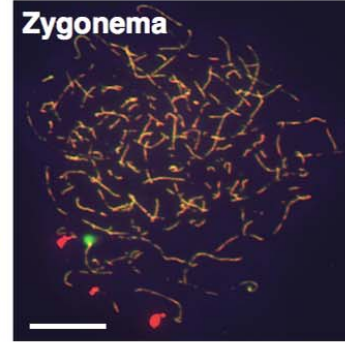

**Stag3<sup>ko/ko</sup>**

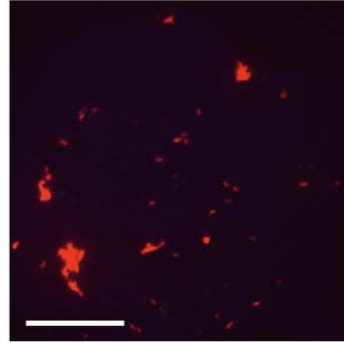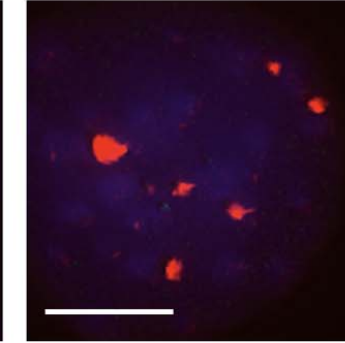

**SYCP3 STAG3 DAPI**

**Supplemental Figure S8:** Immunofluorescence staining of cohesin proteins in oocyte chromosome spreads of wt and *Stag3<sup>ko/ko</sup>* mice, probed with anti SYCP3 and (A) anti-SMC3; (B) anti-RAD21L; (C) anti-RAD21; (D) anti-SMC1 $\beta$ ; (E) anti SMC1 $\alpha$ , and (F) anti-STAG3. Nucleic acids were stained by DAPI. Size bars indicate 10  $\mu$ m.
