# Supplementary material
Source: PubMed Central journal article supplement (PMC4198028)

**Fig. 1C**  
**upper**  
**panel**

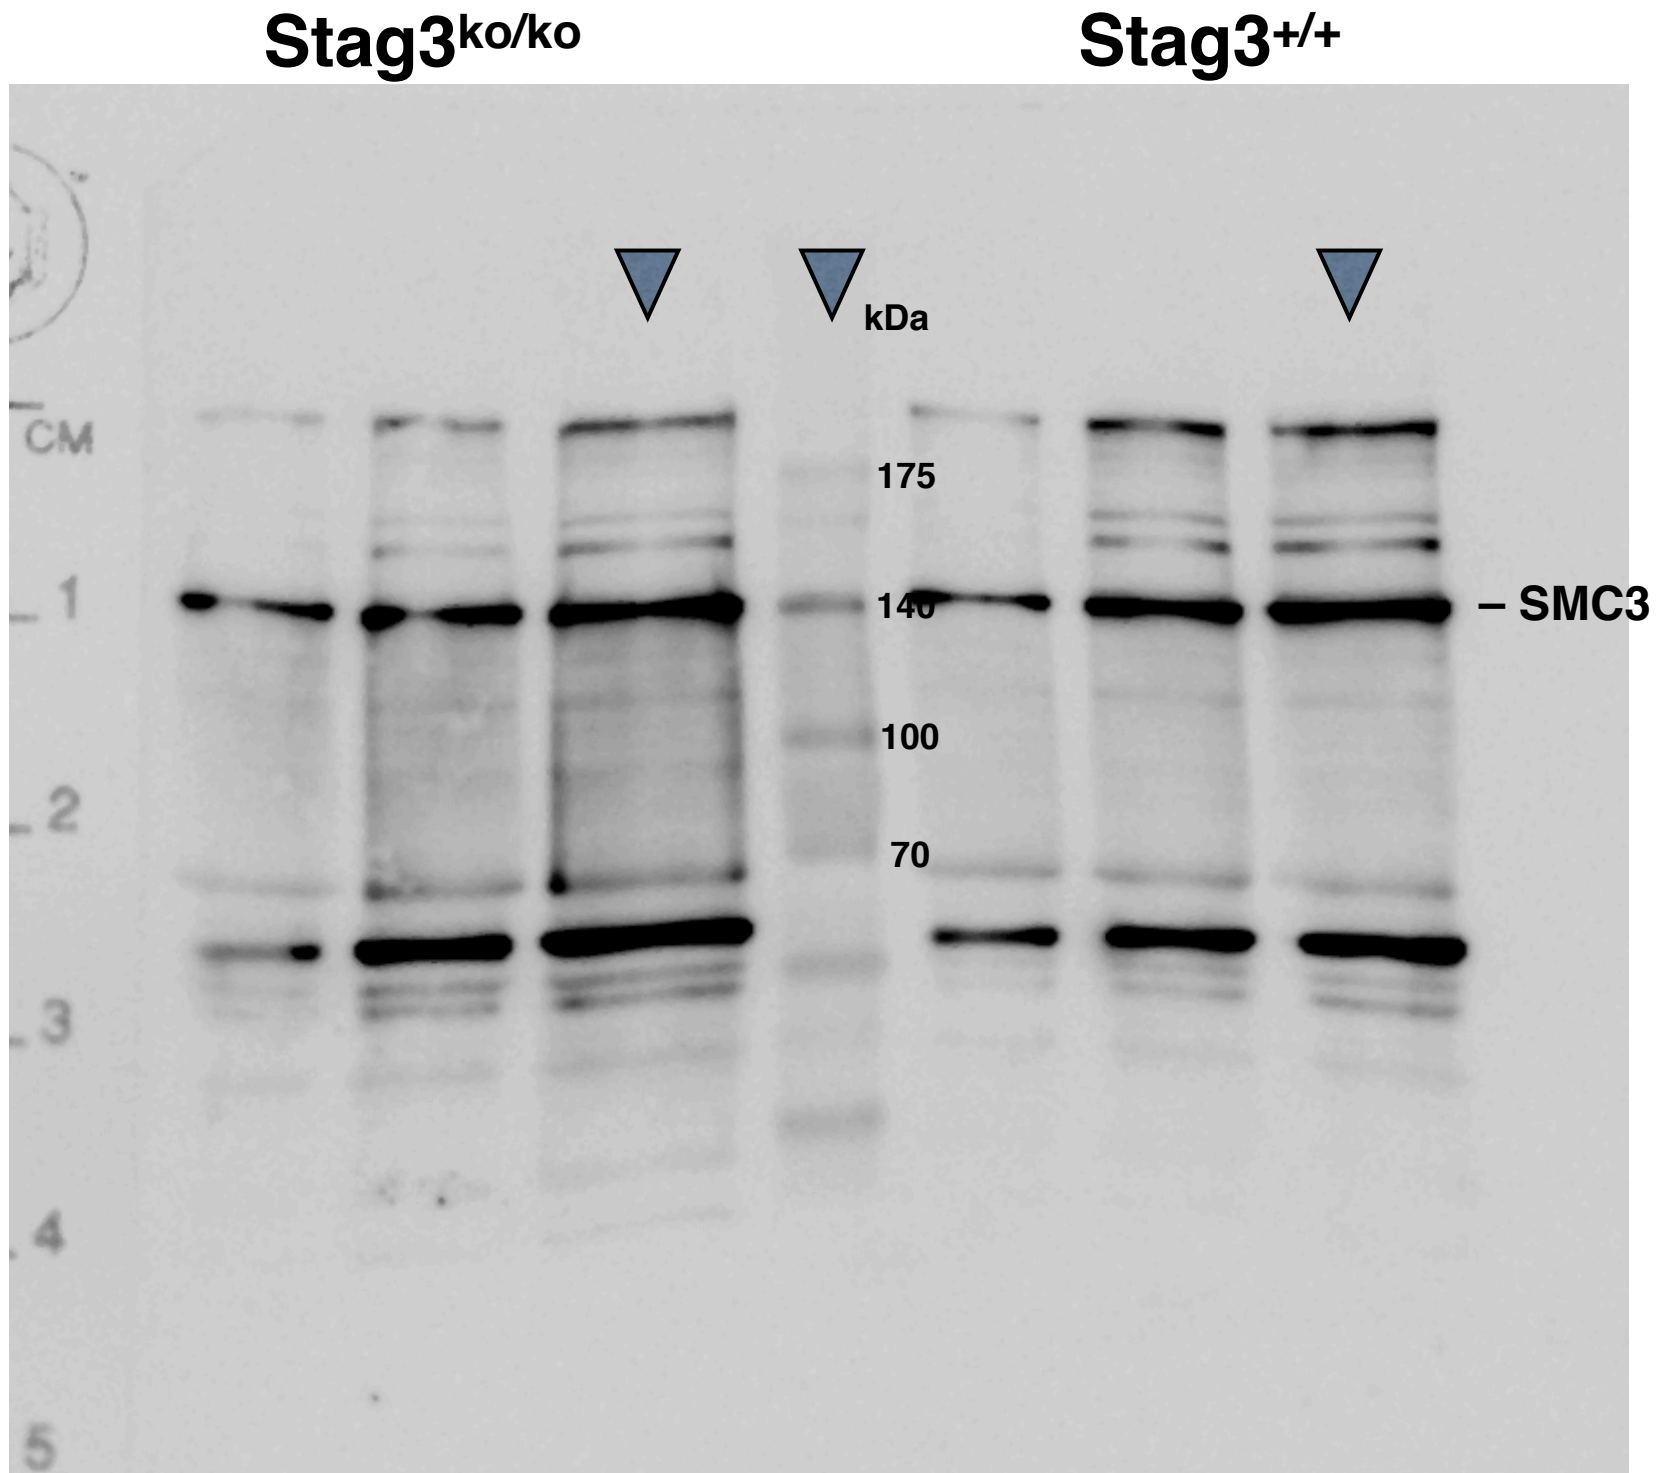

**Fig. 1C**  
**lower**  
**panel**

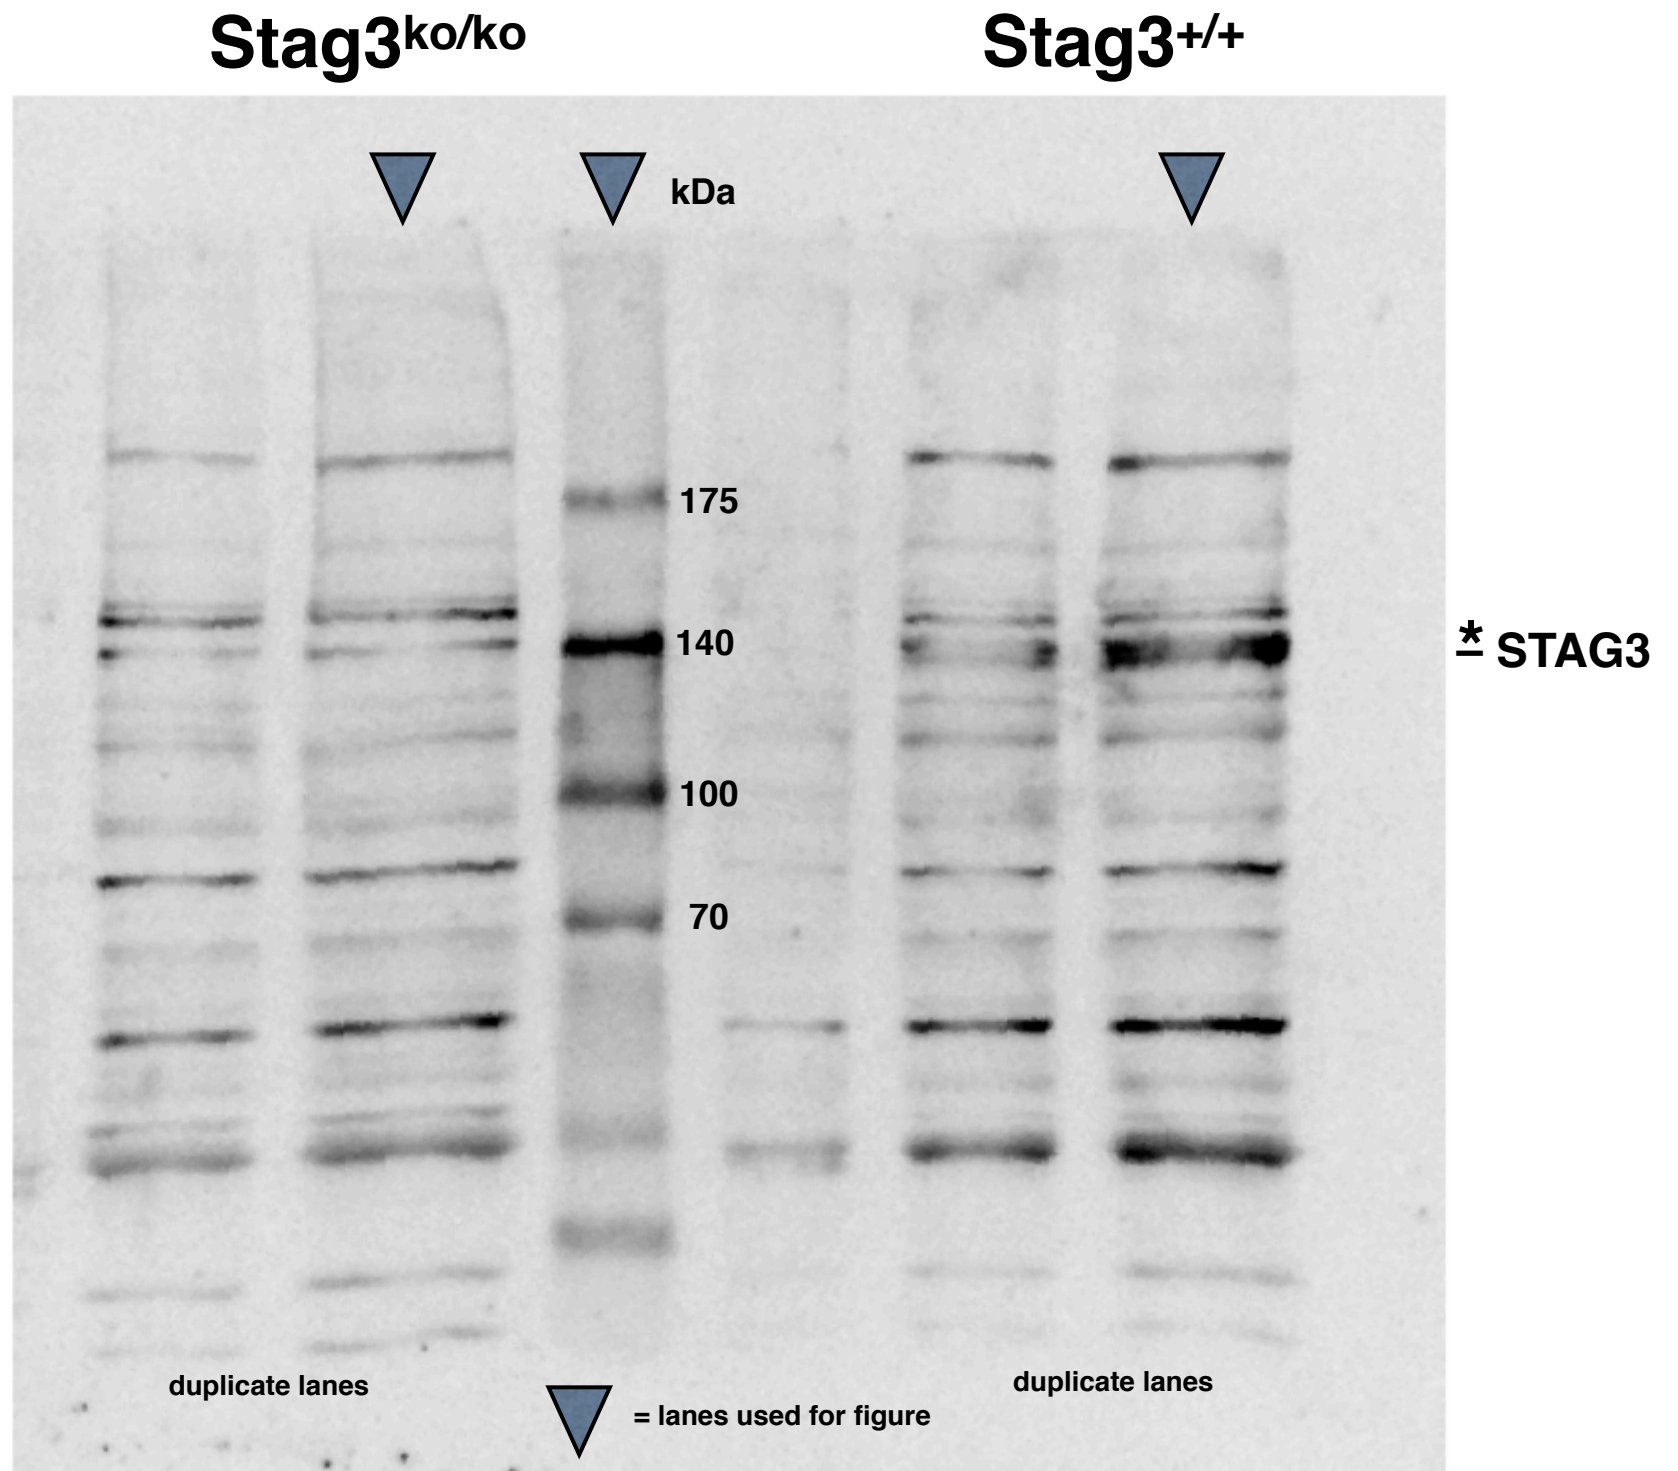

Supplement: embj0033-1256-sd10.pdf [file embj0033-1256-sd10.pdf]

**Fig. 6A**

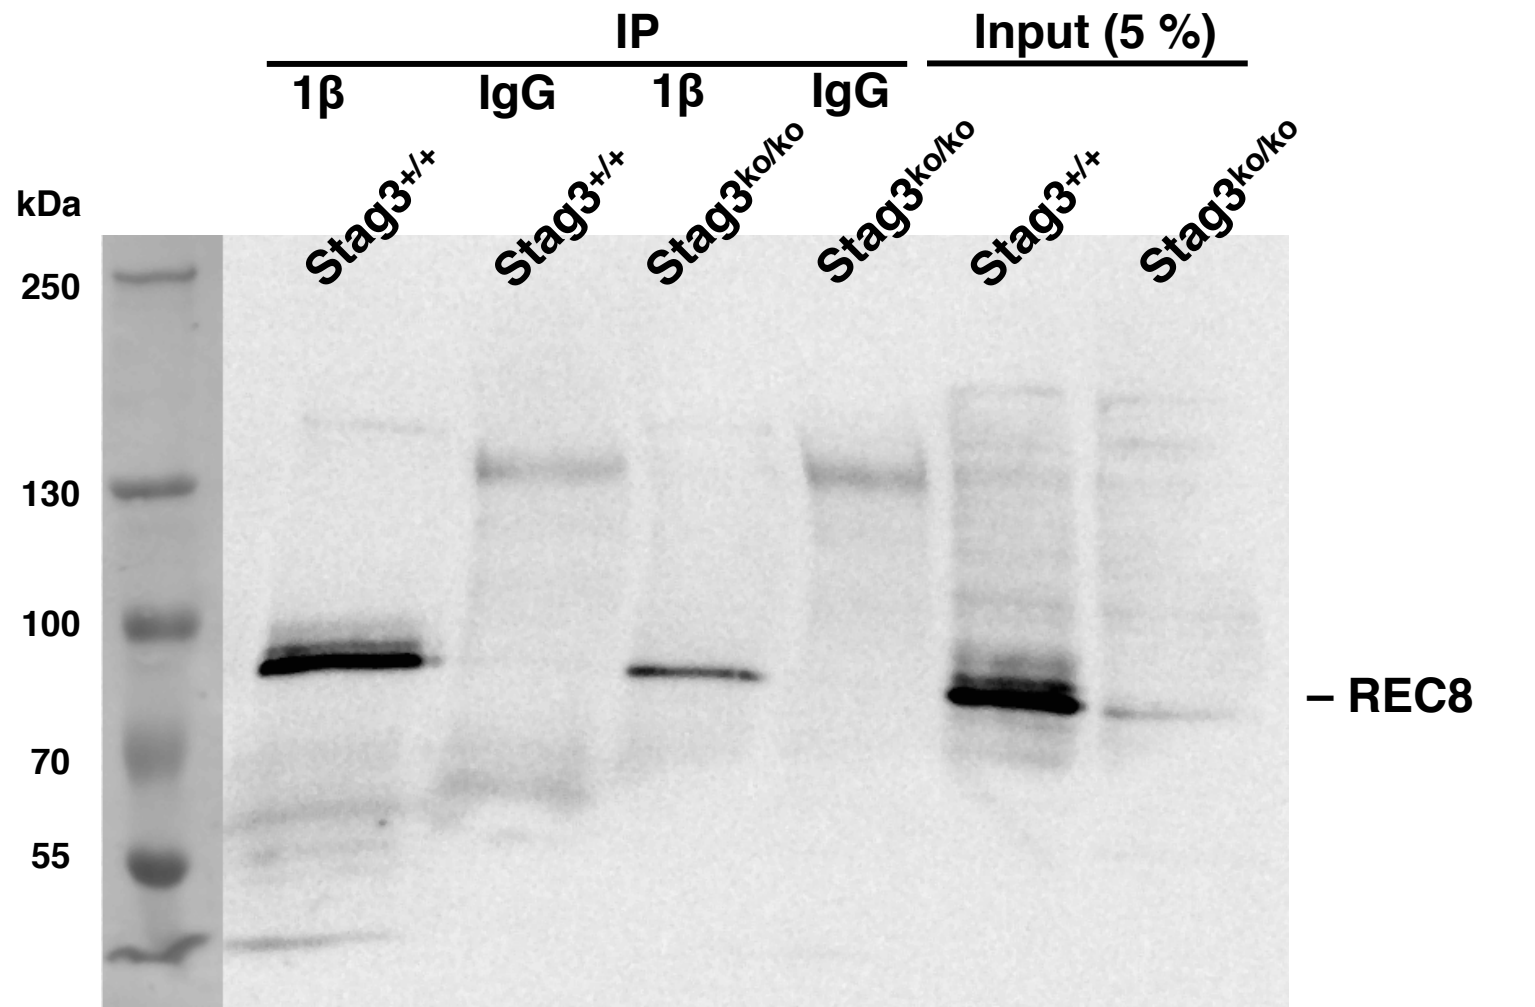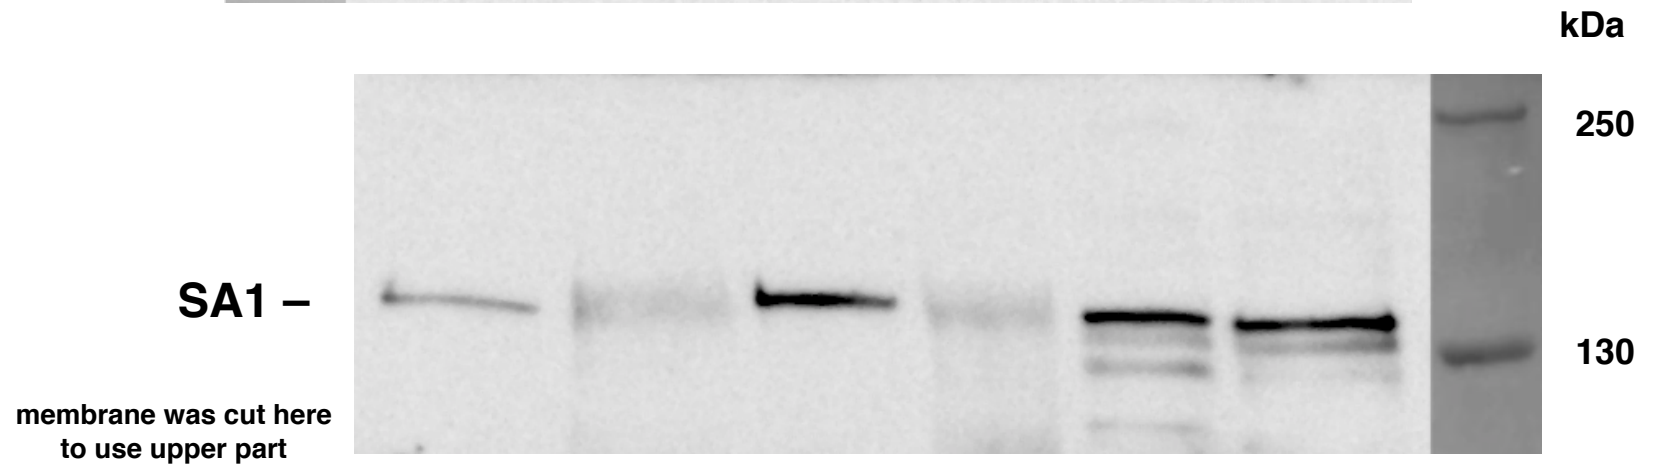

**Fig. 6A**

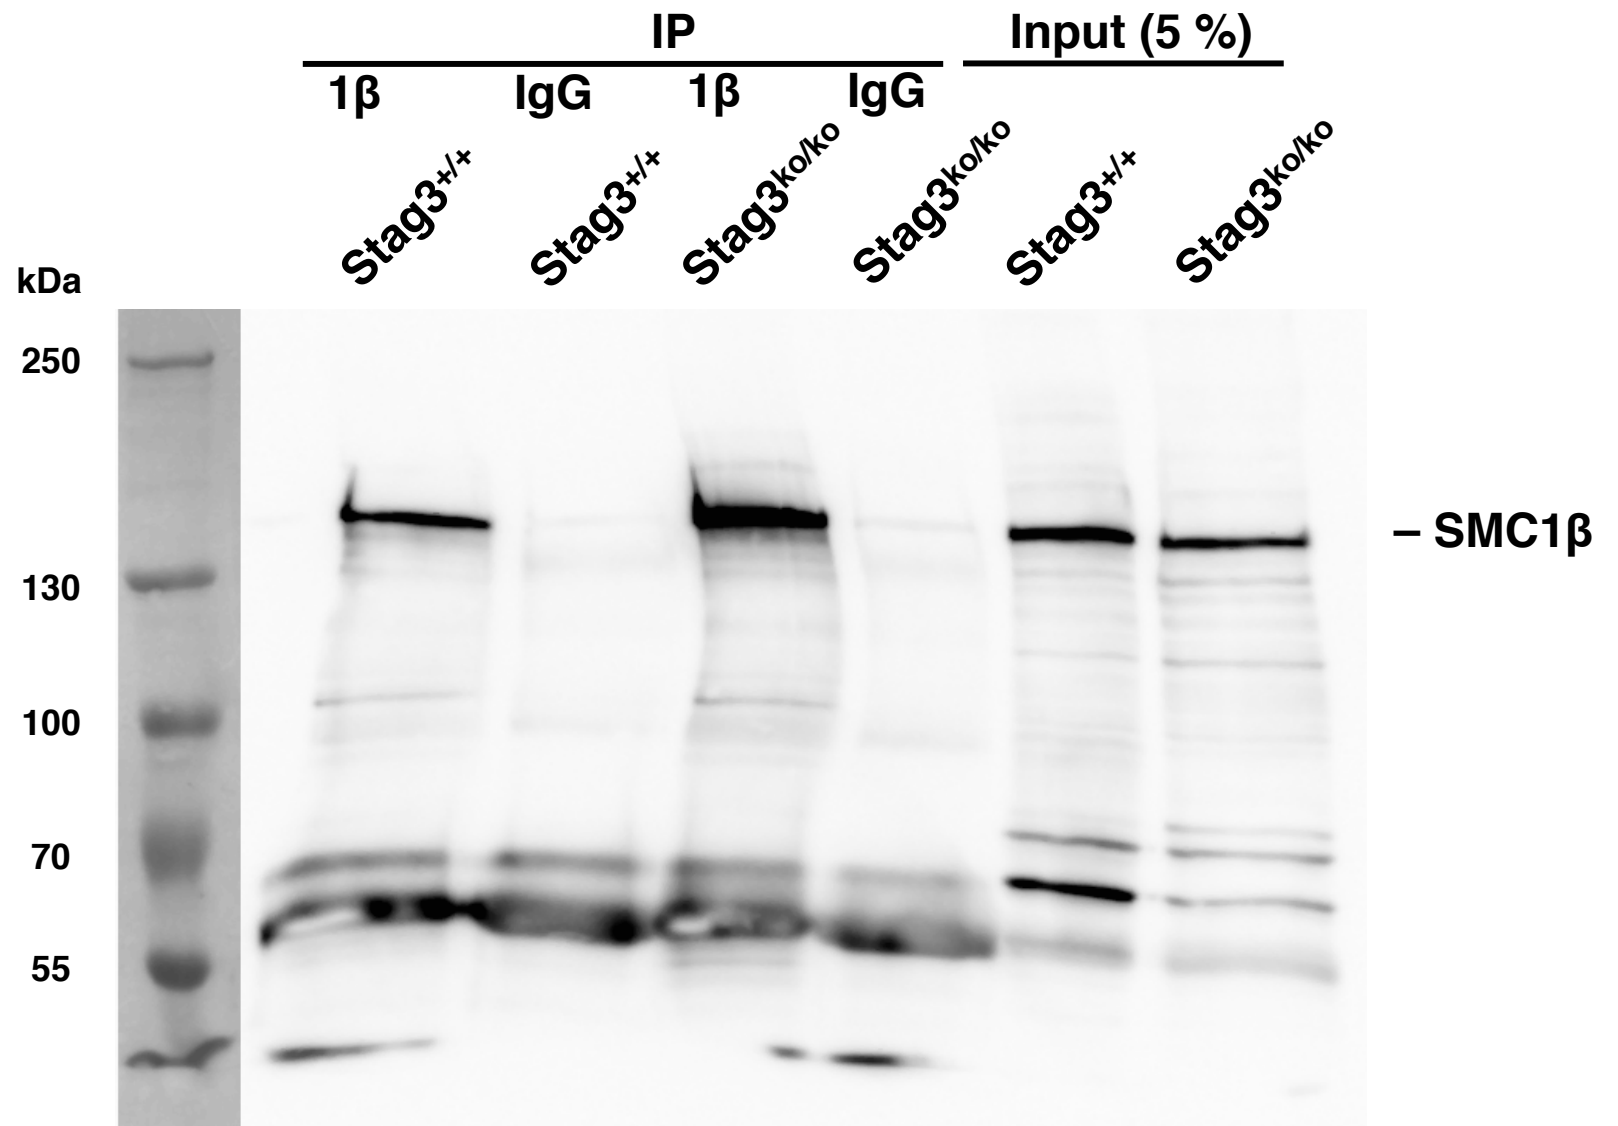

Supplement: embj0033-1256-sd11.pdf [file embj0033-1256-sd11.pdf]

**Fig. 6B**

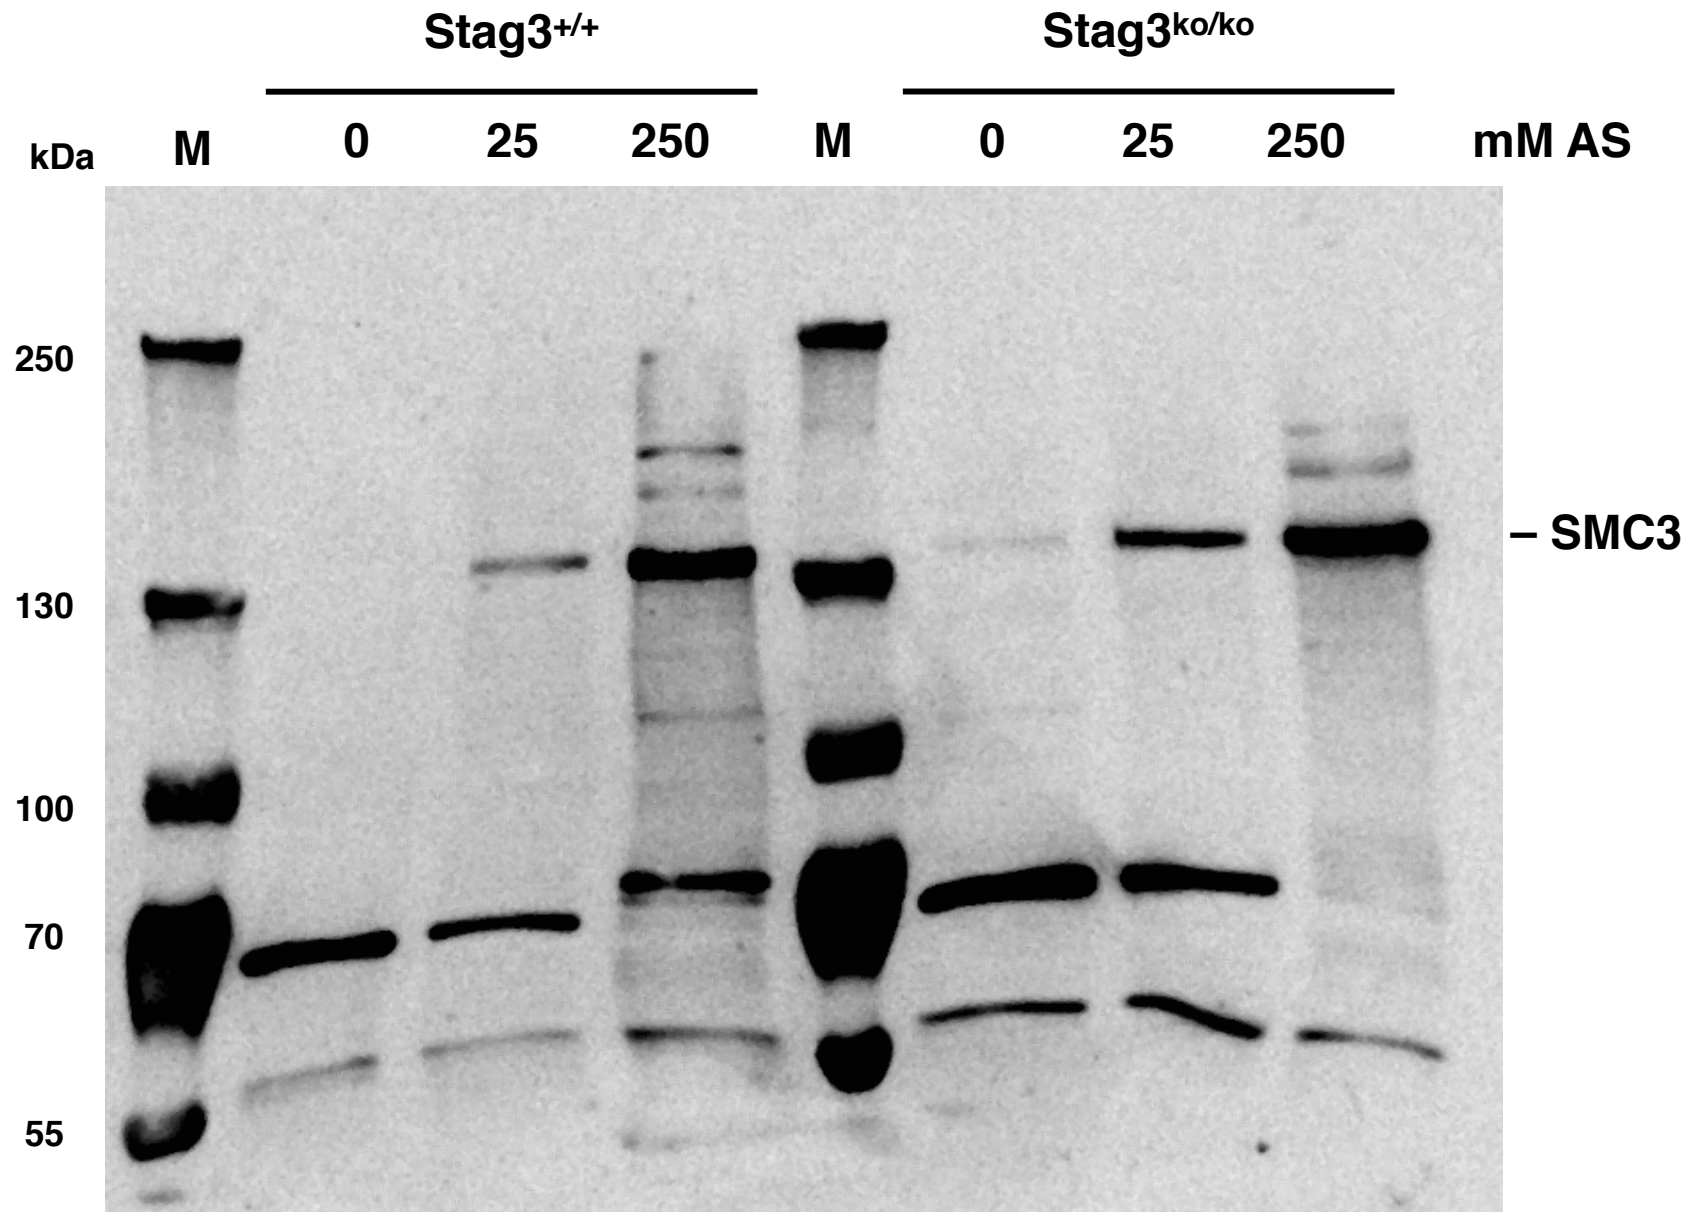



**Fig. 6B**  
**ctd.**

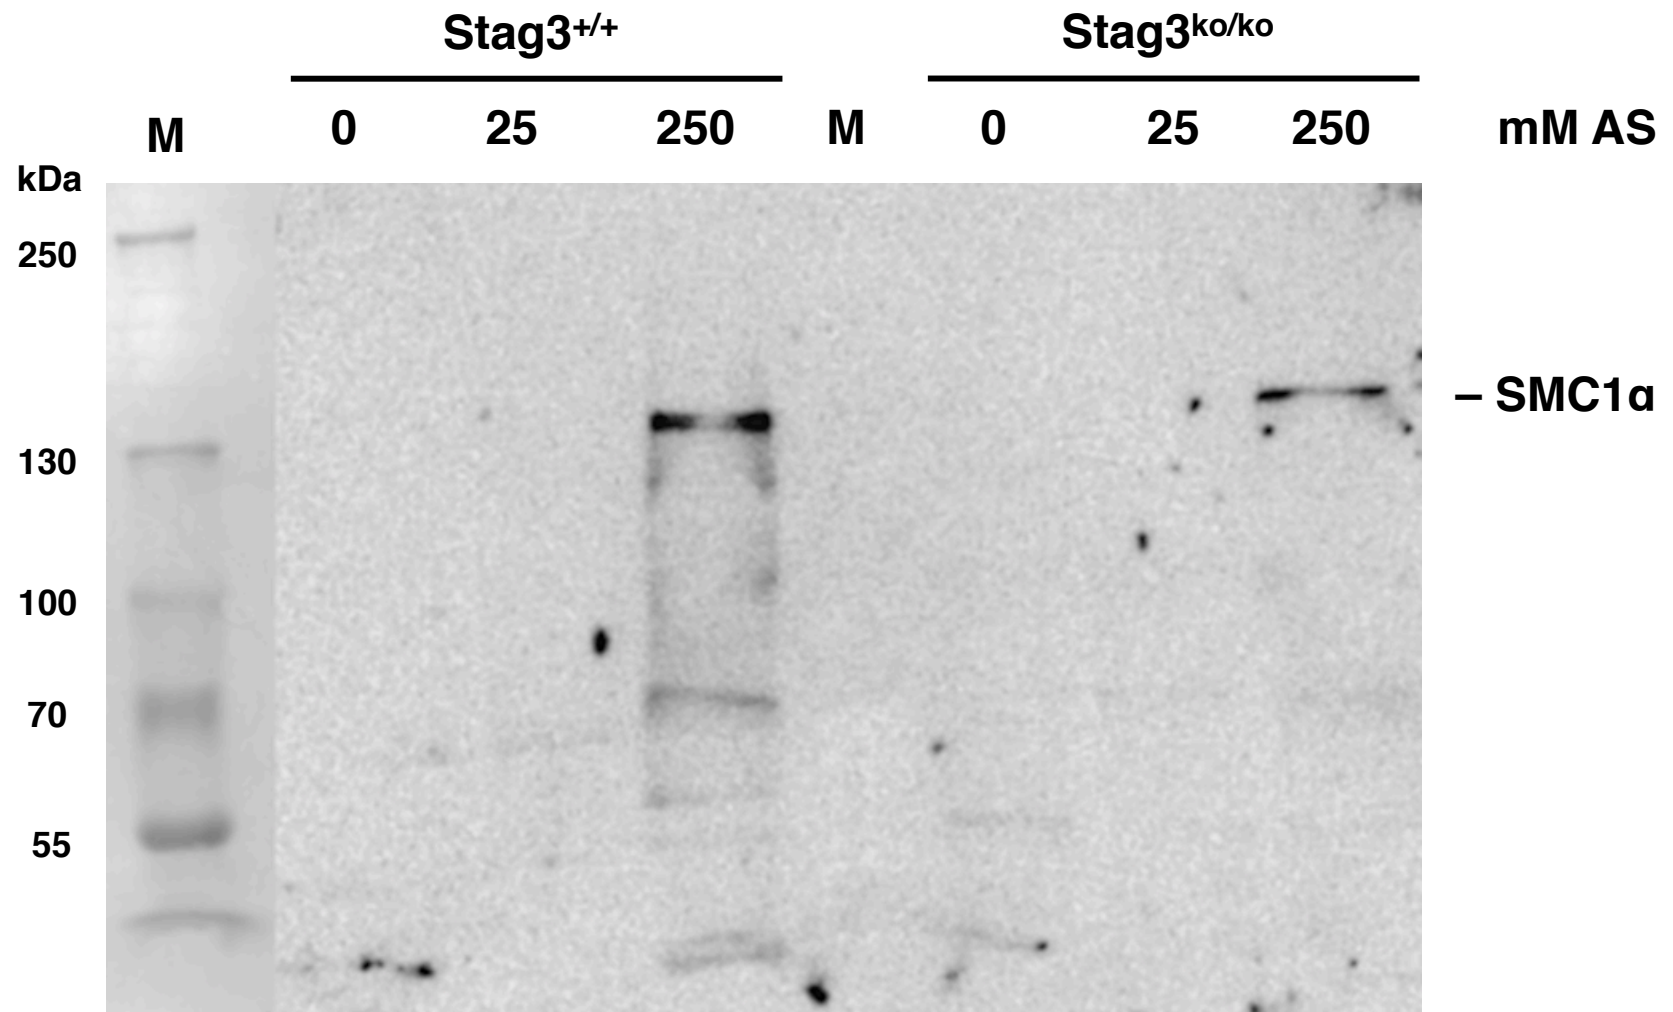

**Fig. 6B**  
**ctd.**

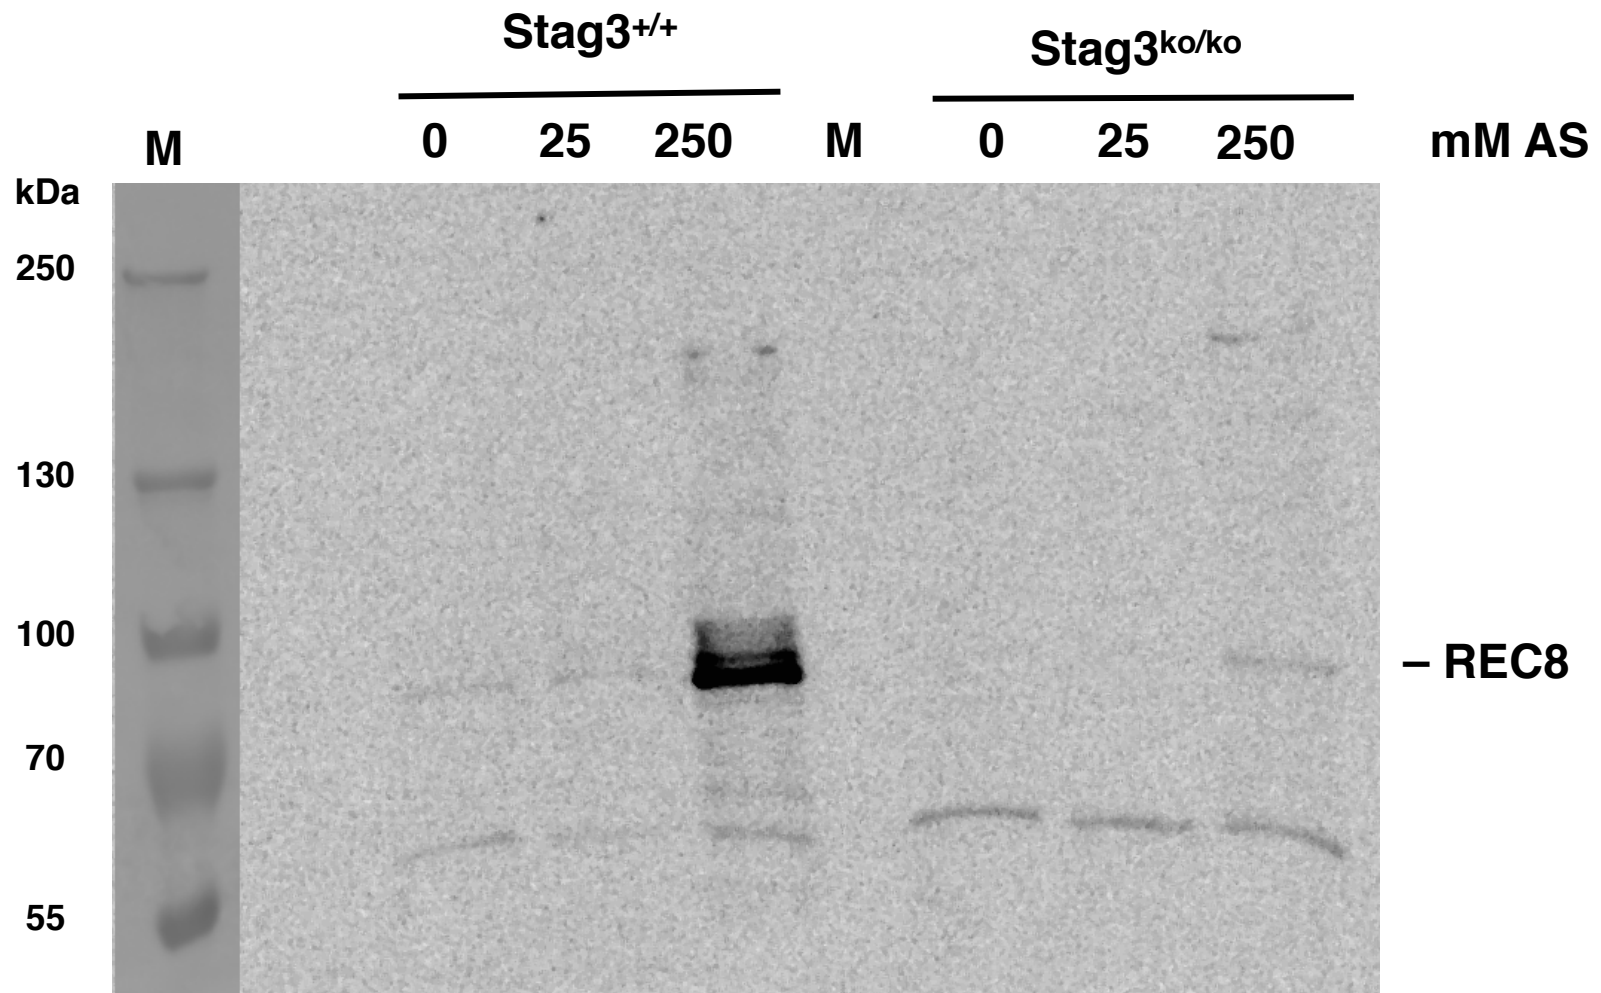

**Fig. 6B**  
**ctd.**

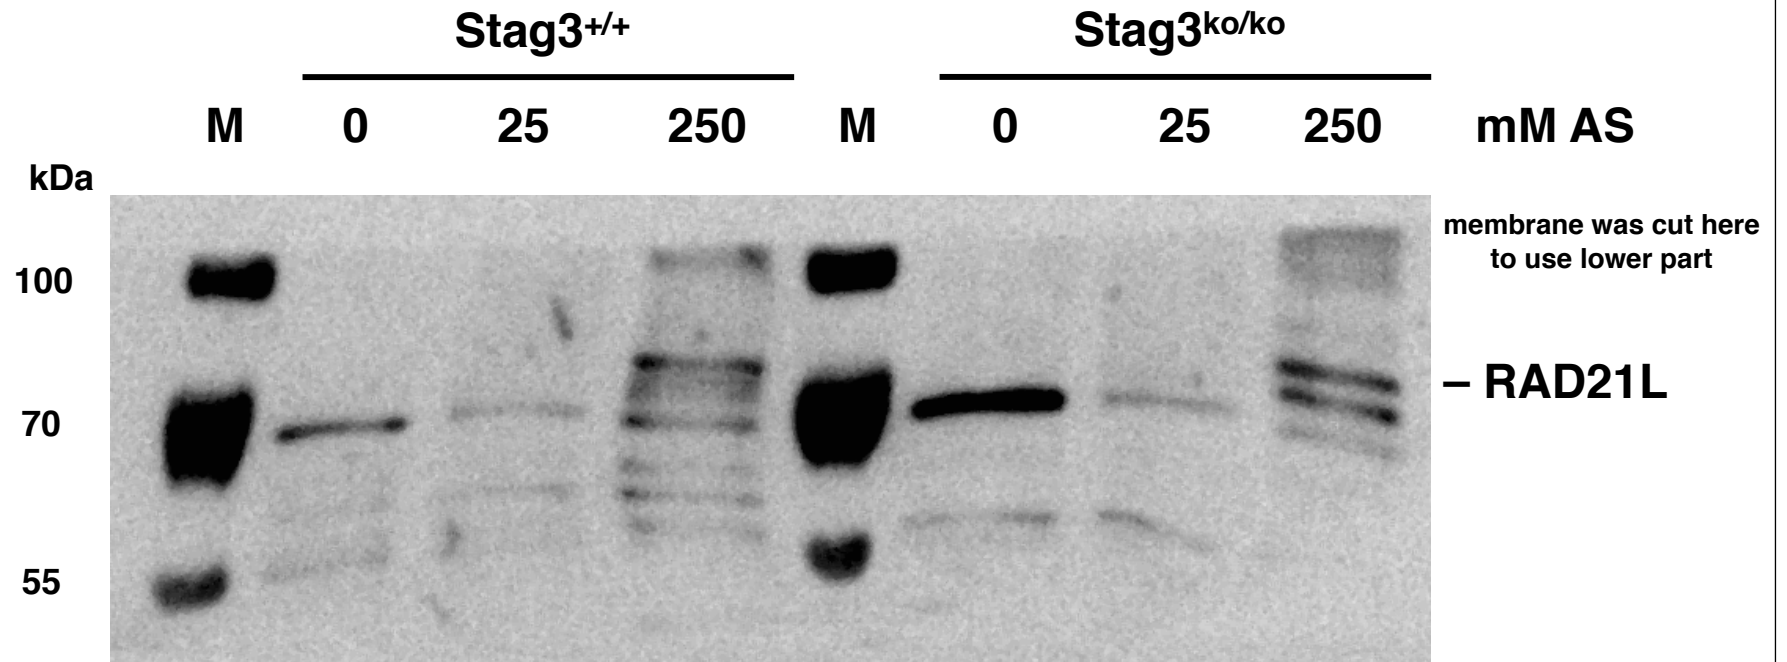

Supplement: embj0033-1256-sd12.pdf [file embj0033-1256-sd12.pdf]
